# Supplementary material
Source: Springer Nature journal article supplement (https://www.springermedizin.de/resource/supplementary/13256_2008_573_MOESM2_ESM.pdf/9646282)

謝奕鑫 (023Y / M)  
07936853  
2007-01-03  
13:52:10

NC KUH  
GENEBB\_BIOMA  
Srs : 4  
Img : 15

BL: 7.00 InV: 9.00 sp  
BP: -73.86  
PP: FFB

FeV: 460 x 460

19 Cm

L: 112  
W: 225

[F]

[L]

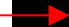

Supplement: MOESM2 [file 9646282]
